# Supplementary material for: Following a potential epileptogenic insult, prolonged high rates of nonlinear dynamical regimes of intermittency type is the hallmark of epileptogenesis
Source: PubMed Central journal article supplement (PMC4973227; doi:10.1038/srep31129), 2016-08-04
Supplement: srep31129-s1.pdf [file srep31129-s1.pdf]

## Supplementary Information

Following a potential epileptogenic insult, prolonged high rates of nonlinear dynamical regimes of intermittency type is the hallmark of epileptogenesis

Massimo Rizzi<sup>1,\*</sup>, Itai Weissberg<sup>2</sup>, Dan Z. Milikovsky<sup>2</sup>, Alon Friedman<sup>2,3</sup>

<sup>1</sup>Department of Neuroscience, IRCCS - Istituto di Ricerche Farmacologiche Mario Negri, Via G. La Masa 19, 20156 Milan, Italy

<sup>2</sup>Departments of Physiology and Cell Biology, Cognitive and Brain Sciences, Zlotowski Center for Neuroscience, Ben-Gurion University of the Negev, Beer-Sheva 84105, Israel

<sup>3</sup>Department of Medical Neuroscience, Faculty of Medicine, Dalhousie University, Halifax, Nova Scotia B3H 4R2, Canada

\*Corresponding author: M. Rizzi, Dept. Neuroscience, IRCCS - Istituto di Ricerche Farmacologiche Mario Negri, Via G. La Masa 19, 20156 Milan, Italy

e-mail address: massimo.rizzi@marionegri.it

**Supplementary Table S1.** Detailed statistics of the variable LAM

|                                         | Time-point of treatment (hours) |               |               |               |               |               |
|-----------------------------------------|---------------------------------|---------------|---------------|---------------|---------------|---------------|
|                                         | 24 h                            | 48 h          | 72 h          | 96 h          | 120 h         | 144 h         |
| <b>Number of values</b>                 |                                 |               |               |               |               |               |
| acsf+dex                                | 2554                            | 2502          | 2000          | 2590          | 2602          | 2658          |
| alb                                     | 1853                            | 1794          | 1327          | 1542          | 1261          | 663           |
| alb+sjn                                 | 1627                            | 1638          | 1254          | 1530          | 1270          | 1033          |
|                                         |                                 |               |               |               |               |               |
| <b>Median, percentile</b>               |                                 |               |               |               |               |               |
| acsf+dex                                |                                 |               |               |               |               |               |
| 25% Percentile                          | 0.0897                          | 0.07513       | 0.07322       | 0.0519        | 0.04932       | 0.0471        |
| Median                                  | 0.2751                          | 0.2401        | 0.2195        | 0.1876        | 0.1741        | 0.1641        |
| 75% Percentile                          | 0.6111                          | 0.5593        | 0.5489        | 0.5478        | 0.4747        | 0.5234        |
| alb                                     |                                 |               |               |               |               |               |
| 25% Percentile                          | 0.2942                          | 0.3089        | 0.2596        | 0.2577        | 0.3087        | 0.1351        |
| Median                                  | 0.5888                          | 0.7215        | 0.5686        | 0.5502        | 0.711         | 0.4859        |
| 75% Percentile                          | 0.9417                          | 1.119         | 1.046         | 1.075         | 1.126         | 0.9734        |
| alb+sjn                                 |                                 |               |               |               |               |               |
| 25% Percentile                          | 0.07659                         | 0.07281       | 0.08835       | 0.108         | 0.1357        | 0.002458      |
| Median                                  | 0.621                           | 0.5434        | 0.2741        | 0.2615        | 0.3048        | 0.3233        |
| 75% Percentile                          | 1.201                           | 0.951         | 0.669         | 0.5813        | 0.6188        | 0.7285        |
|                                         |                                 |               |               |               |               |               |
| <b>Kruskal-Wallis test</b>              |                                 |               |               |               |               |               |
| P value                                 | < 0.0001 ****                   | < 0.0001 **** | < 0.0001 **** | < 0.0001 **** | < 0.0001 **** | < 0.0001 **** |
| Kruskal-Wallis statistic                | 385.7                           | 650.2         | 428.8         | 625.7         | 715.1         | 189.2         |
|                                         |                                 |               |               |               |               |               |
| <b>Dunn's multiple comparisons test</b> |                                 |               |               |               |               |               |
| acsf+dex Vs. alb - Adjusted P Value     | < 0.0001 ****                   | < 0.0001 **** | < 0.0001 **** | < 0.0001 **** | < 0.0001 **** | < 0.0001 **** |
| acsf+dex Vs. alb+sjn - Adjusted P Value | < 0.0001 ****                   | < 0.0001 **** | 0.0036 **     | < 0.0001 **** | < 0.0001 **** | 0.1216 ns     |
| alb Vs. alb+sjn - Adjusted P Value      | 0.001 **                        | < 0.0001 **** | < 0.0001 **** | < 0.0001 **** | < 0.0001 **** | < 0.0001 **** |

Legend: ns, not significant

**Supplementary Table S2.** Detailed statistics of the variable VMAX

|                                         | Time-point of treatment (hours) |               |               |               |               |               |
|-----------------------------------------|---------------------------------|---------------|---------------|---------------|---------------|---------------|
|                                         | 24 h                            | 48 h          | 72 h          | 96 h          | 120 h         | 144 h         |
| <b>Number of values</b>                 |                                 |               |               |               |               |               |
| acsf+dex                                | 2576                            | 2522          | 2005          | 2594          | 2623          | 2678          |
| alb                                     | 1871                            | 1806          | 1337          | 1571          | 1300          | 674           |
| alb+sjn                                 | 1646                            | 1653          | 1266          | 1552          | 1277          | 974           |
| <b>Median, percentile</b>               |                                 |               |               |               |               |               |
| acsf+dex                                |                                 |               |               |               |               |               |
| 25% Percentile                          | 12                              | 11            | 11            | 11            | 11            | 11            |
| Median                                  | 16                              | 16            | 15            | 15            | 15            | 15            |
| 75% Percentile                          | 22                              | 21            | 21            | 20            | 20            | 20            |
| alb                                     |                                 |               |               |               |               |               |
| 25% Percentile                          | 15                              | 15            | 15            | 16            | 16            | 14            |
| Median                                  | 19                              | 21            | 19            | 20            | 21            | 18            |
| 75% Percentile                          | 24                              | 27            | 26            | 25            | 25            | 24            |
| alb+sjn                                 |                                 |               |               |               |               |               |
| 25% Percentile                          | 13                              | 13            | 12            | 12            | 12            | 9             |
| Median                                  | 19                              | 18            | 16            | 16            | 17            | 15            |
| 75% Percentile                          | 28                              | 25            | 23            | 22            | 22            | 21            |
| <b>Kruskal-Wallis test</b>              |                                 |               |               |               |               |               |
| P value                                 | < 0.0001 ****                   | < 0.0001 **** | < 0.0001 **** | < 0.0001 **** | < 0.0001 **** | < 0.0001 **** |
| Kruskal-Wallis statistic                | 208.2                           | 260.1         | 172.4         | 412.0         | 401.8         | 121.6         |
| <b>Dunn's multiple comparisons test</b> |                                 |               |               |               |               |               |
| acsf+dex Vs. alb - Adjusted P Value     | < 0.0001 ****                   | < 0.0001 **** | < 0.0001 **** | < 0.0001 **** | < 0.0001 **** | < 0.0001 **** |
| acsf+dex Vs. alb+sjn - Adjusted P Value | < 0.0001 ****                   | < 0.0001 **** | < 0.0001 **** | < 0.0001 **** | < 0.0001 **** | 0.4671 ns     |
| alb Vs. alb+sjn - Adjusted P Value      | 0.173 ns                        | < 0.0001 **** | < 0.0001 **** | < 0.0001 **** | < 0.0001 **** | < 0.0001 **** |

Legend: ns, not significant

**Graphical representation of statistics of the variable VMAX, as reported in Supplementary Table S2**

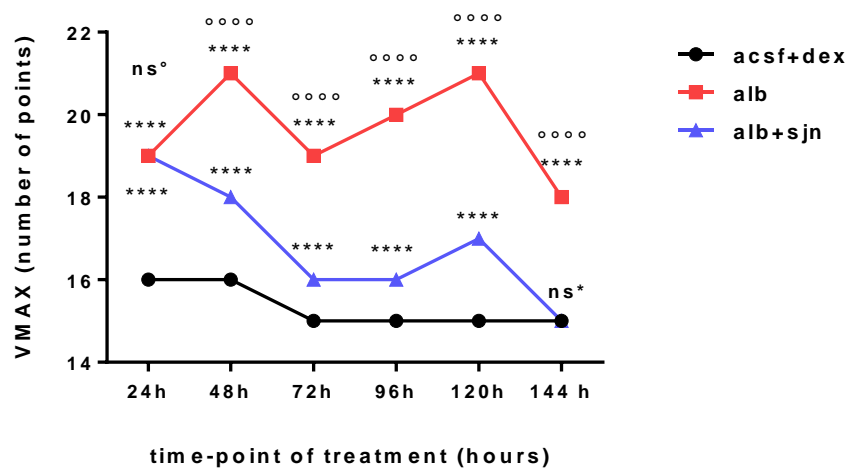

Legend of symbols: \*\*\*\* p<0.0001 vs. acsf+dex; °°°° p<0.0001 alb vs. alb+sjn; ns\* not significant vs. acsf+dex; ns° not significant alb vs. alb+sjn

**Supplementary Table S3.** Detailed statistics of the variable TT

|                                         | Time-point of treatment (hours) |               |               |               |               |               |
|-----------------------------------------|---------------------------------|---------------|---------------|---------------|---------------|---------------|
|                                         | 24 h                            | 48 h          | 72 h          | 96 h          | 120 h         | 144 h         |
| <b>Number of values</b>                 |                                 |               |               |               |               |               |
| acsf+dex                                | 2577                            | 2522          | 2004          | 2594          | 2624          | 2678          |
| alb                                     | 1870                            | 1804          | 1332          | 1568          | 1299          | 673           |
| alb+sjn                                 | 1631                            | 1648          | 1253          | 1544          | 1274          | 974           |
| <b>Median, percentile</b>               |                                 |               |               |               |               |               |
| acsf+dex                                |                                 |               |               |               |               |               |
| 25% Percentile                          | 5.666                           | 5.642         | 5.619         | 5.575         | 5.585         | 5.561         |
| Median                                  | 5.934                           | 5.922         | 5.913         | 5.86          | 5.833         | 5.842         |
| 75% Percentile                          | 6.307                           | 6.268         | 6.266         | 6.214         | 6.213         | 6.242         |
| alb                                     |                                 |               |               |               |               |               |
| 25% Percentile                          | 5.834                           | 5.834         | 5.777         | 5.838         | 5.879         | 5.702         |
| Median                                  | 6.134                           | 6.21          | 6.084         | 6.143         | 6.238         | 6.045         |
| 75% Percentile                          | 6.489                           | 6.667         | 6.598         | 6.603         | 6.651         | 6.46          |
| alb+sjn                                 |                                 |               |               |               |               |               |
| 25% Percentile                          | 5.806                           | 5.808         | 5.685         | 5.638         | 5.655         | 5.627         |
| Median                                  | 6.199                           | 6.143         | 5.943         | 5.874         | 5.895         | 5.975         |
| 75% Percentile                          | 6.901                           | 6.589         | 6.339         | 6.247         | 6.207         | 6.296         |
| <b>Kruskal-Wallis test</b>              |                                 |               |               |               |               |               |
| P value                                 | < 0.0001 ****                   | < 0.0001 **** | < 0.0001 **** | < 0.0001 **** | < 0.0001 **** | < 0.0001 **** |
| Kruskal-Wallis statistic                | 248.3                           | 320.9         | 133.8         | 352.9         | 432.7         | 67.96         |
| <b>Dunn's multiple comparisons test</b> |                                 |               |               |               |               |               |
| acsf+dex Vs. alb - Adjusted P Value     | < 0.0001 ****                   | < 0.0001 **** | < 0.0001 **** | < 0.0001 **** | < 0.0001 **** | < 0.0001 **** |
| acsf+dex Vs. alb+sjn - Adjusted P Value | < 0.0001 ****                   | < 0.0001 **** | 0.0006 ***    | 0.0646 ns     | 0.0264 *      | 0.0084 **     |
| alb Vs. alb+sjn - Adjusted P Value      | 0.0007 ***                      | 0.0026 **     | < 0.0001 **** | < 0.0001 **** | < 0.0001 **** | < 0.0001 **** |

Legend: ns, not significant

**Graphical representation of statistics of the variable TT, as reported in Supplementary Table S3**

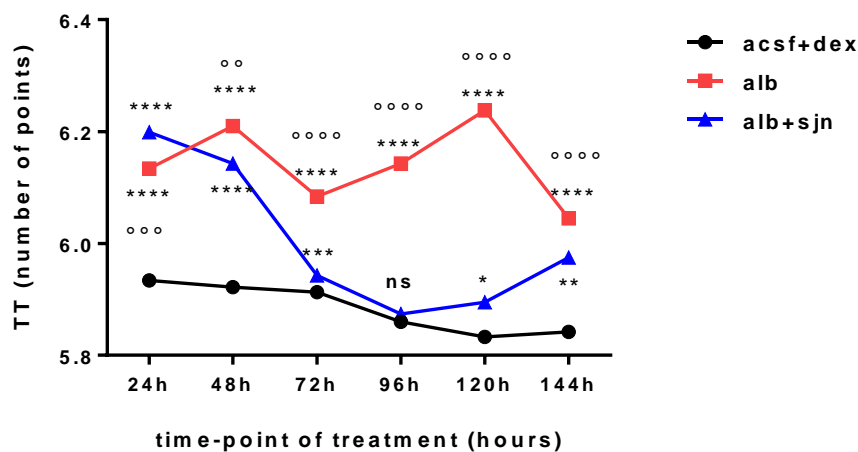

Legend of symbols: \* p<0.05, \*\* p<0.01, \*\*\* p<0.001, \*\*\*\* p<0.0001 vs. acsf+dex; °° p<0.01, °°° p<0.001, °°°° p<0.0001 alb vs. alb+sjn; ns not significant vs. acsf+dex.

## Supplementary Discussion

### The RQA variables based on diagonal lines increase during epileptogenesis

The RQA also provided the measurements of the variables based on the diagonal lines of the recurrence plots, i.e., Determinism, Shannon Entropy and Longest Diagonal Line. These variables are defined as follows [5]:

- Determinism (DET), which represents the fraction of recurrence points forming diagonal lines. Diagonal lines represent epochs of similar time evolution of the states of the system. Therefore, DET is related with the determinism of the system and is expressed as

$$DET = \frac{\sum_{l=l_{min}}^N lP(l)}{\sum_{l=1}^N lP(l)} \quad (5)$$

where  $l$  is the diagonal line length considered when its value is  $\geq l_{min}$  and  $P(l)$  is the probability distribution of the line lengths;

- Longest Diagonal Line (DMAX), which measures the dynamical stability of the system, being inversely related to the largest Lyapunov exponent

$$DMAX = \max(\{l_i, i = 1, \dots, N_i\}) \quad (6)$$

- Shannon Entropy (ENT) of the distribution of the line lengths, which is a measure of the complexity of the recurrence structure

$$ENT = - \sum_{l=l_{min}}^N p(l) \ln p(l) \quad (7)$$

where  $p(l) = P(l)/N_l$  is the probability to find a diagonal line of exactly length  $l$  in the RP, being  $N_l$  the total number of diagonal lines.

Since the main finding is the emergence of the intermittency regime during the period of the epileptogenesis, we decided to report detailed statistics only for the RQA variables strictly correlated with this dynamical regime, and not to show statistics for the other variables. However, also the RQA variables based on the diagonal lines increase significantly during the period of the epileptogenesis.

Specifically, for the variable DET (which was normalized to the RAD, as for the variable LAM), the results are qualitatively and statistically similar to those of the variable LAM. This was expected, since the intermittency regime is characterized by the occurrence of bifurcations, that is, dynamic transitions of the system, which lead to a general increment of the occurrence of pseudo-periodic and/or slowly changing states, which increase the degree of predictability of the system, hence the increment of the variable DET. An analogous result was found during the period of epileptogenesis induced by SE [2]. Also the variables DMAX and ENT are significantly increased during the period of epileptogenesis, as expected also for these variables and similarly to what found during the period of epileptogenesis induced by SE [2]. However, during the first 96 hours of infusion of treatments, it is of interest to observe that for the experimental group of the animals treated with SJN2511, the measurements of the DMAX and the ENT are significantly higher than those met in the albumin treated group. Since the values of the variables LAM (fig. 1, panel A) and DET remain significantly higher than those measured in the control group, but lower respect to the albumin treated group, the increments of the variable DMAX and ENT are the expression of laminar/intermittency states. Nevertheless, the trajectories in the phase space of such laminar/intermittency states are denser, as reflected by the statistically significant decrease of the variable RAD, a phenomenon that occurs only for this specific group. This suggests a very different shaping of the trajectories in the phase spaces of the ECoG epochs selected from the SJN2511 treated group, maybe due to the occurrence of different types of intermittency, intermixed with

not identified transients dynamics. In authors' opinion, it cannot be excluded that the phenomenon of the statistically significant decrease of the variable RAD, followed by the increments of the variable DMAX and ENT, could represent the dynamic expression of the anti-epileptogenic mechanism(s) exerted by the SJN2511.

### **Laminar states occur also in physiological conditions**

In authors' opinion, it is of interest to notice that also in the experimental control group, laminar states occur as expression of ongoing actual nonlinear phenomena, although at a weaker extent. This is supported by the validation test of our results (see the 'Methods' section, paragraph 'Validation test of results'), and suggests that the laminar/intermittency regime could be a dynamical state which may occur also without an overt pathology. Since 'micro-seizures' occur also in human healthy subjects [11], our findings lend support to the hypothesis that the main aberrant feature of the epileptic phenomena could be the spreading over abnormally extended spatio-temporal scales of physiological phenomena, which normally involve a reduced number of cells, for a short period of time [11, 12]. The occurrence of laminar states in basal conditions was detected also in our previous investigation [2].
